# Supplementary material
Source: Springer Nature journal article supplement (https://www.springermedizin.de/resource/supplementary/12970_2013_415_MOESM3_ESM.pdf/9593906)

### A: VAS

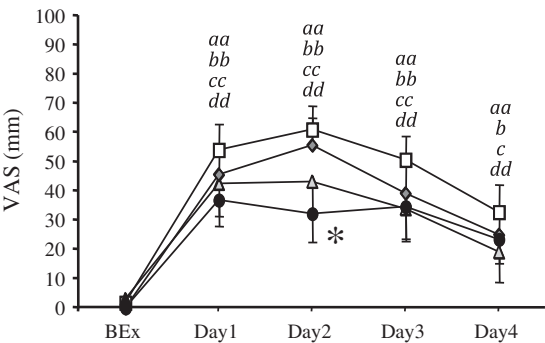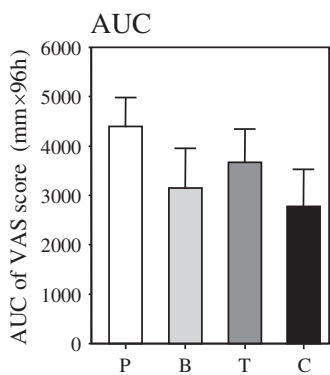

### B: CIR

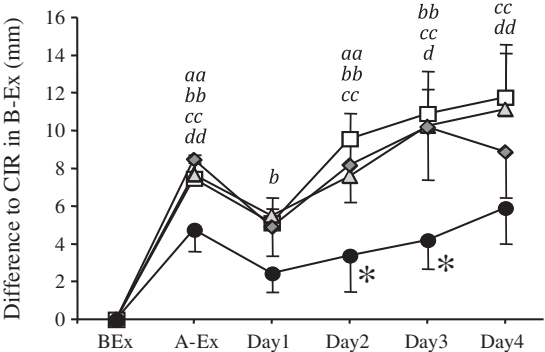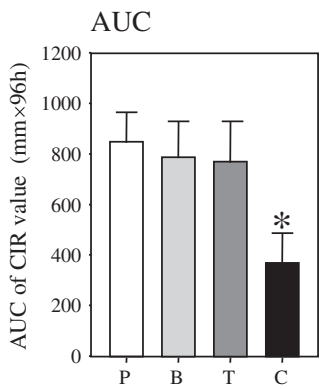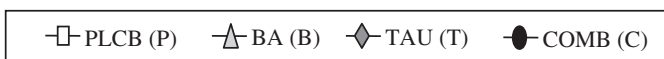

Supplement: MOESM3 [file 9593906]
